# Supplementary material for: The last interglacial sea-level record of New Zealand (Aotearoa)
Source: Copernicus journal article supplement (doi:10.5194/essd-2020-288), 2020-10-15
Supplement: Supplementary file [file essd-2020-288-AC3-supplement.pdf]

# Response to Comments by Dr. Nicola Litchfield (Referee) to “The last interglacial sea-level record of New Zealand (Aotearoa)”

Deirdre D. Ryan<sup>1\*</sup>, Alastair J.H. Clement<sup>2</sup>, Nathan R. Jankowski<sup>3,4</sup>, Paolo Stocchi<sup>5</sup>

<sup>1</sup>MARUM – Center for Marine Environmental Sciences, University of Bremen, Bremen, Germany

<sup>2</sup>School of Agriculture and Environment, Massey University, Palmerston North, New Zealand

<sup>3</sup> Centre for Archeological Science, School of Earth, Atmospheric and Life Sciences, University of Wollongong, Wollongong, Australia

<sup>4</sup>Australian Research Council (ARC) Centre of Excellence for Australian Biodiversity and Heritage, University of Wollongong, Wollongong, Australia

<sup>5</sup>NIOZ, Royal Netherlands Institute for Sea Research, Coastal Systems Department, and Utrecht University, PO Box 59 1790 AB Den Burg (Texel), The Netherlands

8 March 2021

## 1. Summary

We thank Dr. Litchfield for her review of our manuscript. Within this response we address each comment individually and detail any changes made to the original manuscript. Comments by Dr. Litchfield are provided in italic, with our response in standard font, and changes to manuscript are in blue.

## 2. Overview Comment

*This paper presents a very useful new dataset of last interglacial relative sea level indicators for New Zealand (NZ) Aotearoa. The dataset appears to have been rigorously compiled to the WALIS global standard and it is useful, albeit humbling (in terms of the relatively few datapoints able to be compiled), to see these data in a global context. The paper is very well written and appropriately illustrated, bar the minor points I discuss below and on the annotated pdf. I have not checked the calculations, in part because I don't fully understand the methods (discussed below), but I suspect there are no major errors as the calculations are not complex.*

We are pleased that Dr. Litchfield found our compilation useful and we thank her for her constructive comments, which will serve to improve this work. Responses to specific comments are provided below.

## 3. Specific Comments

**Comment 1.** *The largest issue I have with the paper in its current form is the lack of detail on the methods (section 2 is notably brief). I appreciate that this paper is part of a special issue and the methods and parameter descriptions are described elsewhere, but nevertheless I do think there should be some brief additions to this paper to make it more stand-alone. This will be particularly useful to NZ readers. I have noted these on the annotated pdf, but the key methods are: 1) What criteria did you use to include datapoints? Can you provide more info (e.g., a list) on the publications reviewed but not included? 2) Explain the RSL indicators (marine-limiting, direct sea level, terrestrial limiting). It would be particularly helpful to see these labelled on Figure 1, similar to Figure 2 of Rovere et al. (2016). 3) Explain the indicative meaning calculation. In particular the calculations in the IMCalc tool, and the calculation of uncertainties. For each of these I'm thinking of one or a two sentences of relatively high explanation and then referring to the other papers and links for more details. It would also be helpful (again, especially for a NZ audience) to work through an example for 2 and 3.*

In response to the numbered criteria in the comment:

1) A sentence was added to clarify the criteria required for a data point to be considered an RSL indicator:

In order to be considered for entry into WALIS as an RSL indicator, a data point must have three characteristics (Rovere et al., 2016): 1) elevation referred to a defined sea-level datum, and position (latitude and longitude) referred to a known geographic system; 2) its offset (relative or absolute) from a former sea-level needs to be known; and 3) it must have an established age (relative or absolute).

2 and 3) An example of a marine-limiting and direct RSL indicator is already provided in Section 2. However, we expanded the explanation to provide further clarity. Greater description of indicative meaning and the IMCalc tool was also added. This includes a new Table 1 which details the indicative meaning of the RSL indicators identified in this review. Figure 1 and its caption were altered to provide better illustration and description of indicative meaning and the calculation of paleo sea level. Changes to text are as follows:

In this review, depending on whether the elevation for the marine terrace RSL indicator came from the basal platform, marine cover beds or terrestrial cover beds, the RSL indicator is identified as either a marine-limiting point, a direct indicator, or terrestrial-limiting point, respectively. Limiting data points are derived from landforms that cannot be directly related to sea level and therefore, it is not possible to quantify with useful accuracy its formation relative to mean sea level (Rovere et al., 2016). These data points only inform whether sea level was above (marine-limiting) or below (terrestrial-limiting) their elevation at the time of their formation. For example, marine terrace sediments for which the depositional environment hasn't been constrained and/or are located an undefined distance from the inland terrace riser (paleoshoreline), are considered marine-limiting. Marine terrace sediments with evidence of wave action can be constrained to a tidal range and possibly depositional environment (e.g. a beach deposit) and related directly to sea level.

New Zealand RSL indicators have also been identified at depths below modern sea level. These indicators, from within sediment and well cores, are described as sediment packages that vary by location. The depositional environment with which those sediment facies were correlated dictate how the datapoint is identified in this review; i.e. a marine- or terrestrial-limiting point or a direct sea-level indicator. For example, the Bromley Formation (Brown et al., 1988) is considered terrestrial limiting due to its depositional environment described as beach, lagoonal, dune, and coastal swamp sediments associated with rising and high sea level.

Determining where a paleo-RSL indicator formed with respect to elevation above or below a tide level (commonly mean sea level) is the most fundamental attribute necessary for paleo-RSL reconstructions. This relationship is established by the indicative meaning of a modern analog (Shennan, 1982; van de Plassche, 1986; Rovere et al., 2016), which basically assumes that the relationship of the equivalent modern landform to a tidal level is representative of the same relationship for the paleo-landform. The indicative meaning consists of two parts: the indicative range (IR) defines the elevation range over which an indicator may form, i.e. the upper and lower limits (Figure 1); and the midpoint of that range is the reference water level (RWL), which is defined by its elevation above or below a geodetic datum or tidal level (Table 2). The observed RWL of the modern analog is used to calculate the height of paleo-sea level with respect to the paleo-RSL indicator by simply subtracting the RWL from the elevation of the paleo-RSL indicator (Figure 1). Uncertainty in this measurement is derived from the precision of the measurement method used and the IR – the greater the IR, the greater the uncertainty. Modern analogs should be recorded locally to reflect differing coastal geomorphology and oceanographic patterns.

| Name           | Indicative Range                                 |                                                        | Reference Water Level (in relation to tidal level or geodetic datum)       |
|----------------|--------------------------------------------------|--------------------------------------------------------|----------------------------------------------------------------------------|
|                | upper limit                                      | lower limit                                            |                                                                            |
| Beach deposit  | ordinary berm                                    | breaking depth                                         | (Ordinary berm + breaking depth) / 2                                       |
| Beach swash    | spring tidal range / 2 OR mean higher high water | mean sea level                                         | (spring tidal range / 2 OR mean higher high water + mean sea level) / 2    |
| Marine Terrace | storm wave swash height                          | breaking depth                                         | (storm wave swash height + breaking depth) / 2                             |
| Shore platform | mean higher high water                           | midway between mean lower low water and breaking depth | (mean higher high water + (breaking depth - mean lower low water) / 2) / 2 |
| Lagoon deposit | mean lower low water                             | depth of lagoon bottom                                 | (mean lower low water + modern lagoon depth) / 2                           |

Modern analog information was provided in only one study from the Northland Region (Nichol, 2002). For all other indicators, the indicative meaning of the modern analog was quantified using the IMCalc tool (Lorscheid and Rovere, 2019). IMCalc determines indicative meaning for any point along the global coastline using hydro- and morphodynamic equations with inputs from global wave and tide datasets to determine the indicative range of coastal landform features from which a reference water level is derived (the midpoint). The only required inputs to IMCalc to determine indicative meaning for a modern datapoint are the latitude and longitude and type of coastal landform feature; e.g. marine terrace.

Due to the prevalence of coastal deformation around New Zealand, the measured elevation of the RSL indicators is provided in Section 4 rather than the paleo sea-level interpretation, which in many instances would be off by tens of meters from what can realistically be expected. However; the indicative meaning and inferred paleo sea level is available in the database (<http://doi.org/10.5281/zenodo.4056376> Ryan et al., 2020a).

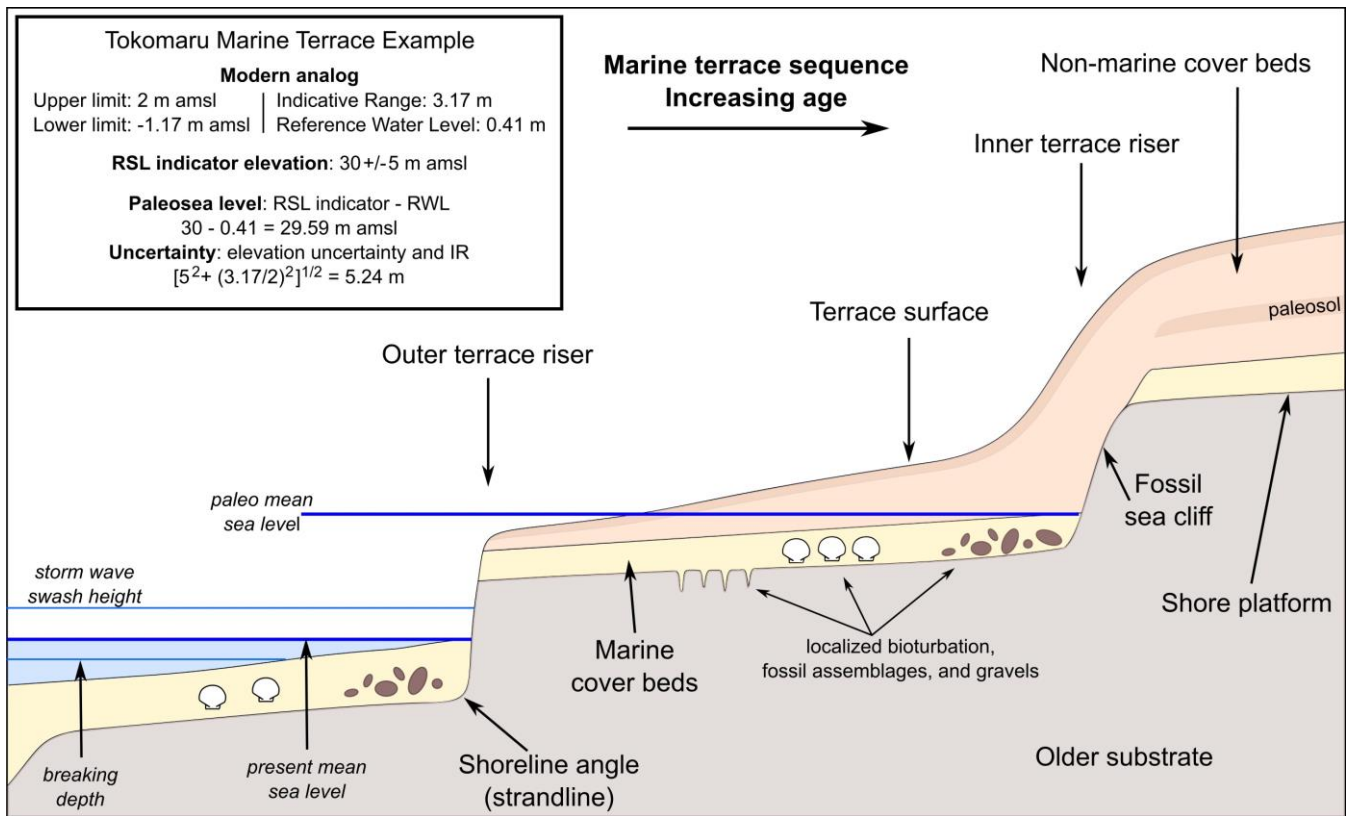

**Figure 1: Illustration of marine terrace terminology (adapted from Pillans, 1990b). The indicative range of a marine terrace landform is marked by the storm wave swash height (upper limit) and breaking depth (lower limit; Rovere et al., 2016). (See Table 2 for indicative range of other RSL indicators.) Marine terrace cover beds can be terrestrial-limiting (terrestrial sediments) or either marine-limiting or a direct indicator of sea level depending upon the availability of stratigraphic or sedimentologic information with which to relate to sea level. In this analysis, basal shore platforms underlying marine sediments were considered marine-limiting when elevations were taken from the outer terrace riser or an undefined distance from the inner margin and relationship with paleo-sea level could not be constrained. The inset provides a worked example of the paleo sea-level calculation for the MIS 5 fossil sea cliff ( $30 \pm 5$  m amsl) of the Tokomaru Terrace near Otaki (Palmer et al., 1988; Section 4.1.6).**

**Comment 2.** To expand upon the criteria method a bit further, having done similar compilations in the past (e.g., Beavan and Litchfield, 2012), I am aware of a number of other data sources such as geological maps, student theses and groundwater reports that have some LIG SL information in them. I suspect many of them were examined and were unable to be used because they didn't contain specific locations, elevations, or ages, or perhaps there was a preference for peer-reviewed papers or publicly available reports? For example I was also going to raise the Ninis (2018) thesis raised by reviewer Tim Naish, and I see from the response that the authors were aware of it but chose not to include it so as not to scoop the publication (thanks for that and yes, it is in progress and can be provided later). Some that I thought would have provided useful information are the Ota et al. (1981) Late Quaternary tectonic map of NZ, the Dravid and Brown (1987) Heretaunga Plains Groundwater report (references are contained in Beavan and Litchfield 2012) and the paper by Schermer et al. (2009) Tectonics, 28: TC6008; doi: 10.1029/2008TC002426.

To clarify what publications were examined for potential inclusion into WALIS, the following sentences were added to Section 1:

For our review, preference was given to peer-reviewed publications; although student theses heavily referenced in later work were included (e.g. Goldie 1975; Hicks, 1975) if made available. Geological maps, while useful in indicating the extent of marine deposits and general location of a paleo-shoreline, seldom provide precise descriptions, geographical locations, or elevations above sea level of a singular data point; e.g. Nathan, 1975; Begg and Johnston, 2000. However, a publication not having sufficient information for the identification of an RSL indicator, did not preclude its usefulness or inclusion in this review. Many publications contained research worthy of discussion in Section 4. Other publications, some geological maps and government reports were behind paywalls or were not found in the course of this review.

In response to the specifically listed references by Dr. Litchfield: Ota et al. (1981) we were aware of but it is behind a paywall. We could only locate an executive summary of the Dravid and Brown (1987) report, which did not provide sufficient information to identify RSL indicators. Schermer et al. (2009) we were not aware of. It is worth noting, that at some point the publication chase must stop and the writing must begin. While we tried to be as comprehensive as possible, it is unrealistic to expect availability or awareness of every single publication that may contain data points qualifying for entry into WALIS or even for consideration in the paleosea-level discussion. One of the great qualities of WALIS is that it is a ‘living’ database – meaning that anyone can add additional data points and future versions of reviews can build off of this first special issue.

Dr. Litchfield, in her pdf comments (and above in **Comment 1**), also requests a list of publications reviewed. Most publications are included in this review and are therefore, listed in the references. Some publications that were reviewed but found not meeting the standards necessary for inclusion in WALIS were not downloaded and we did not keep a record of this. While we appreciate that it would be somewhat helpful to provide a list of these publications, identifying them would require re-reviewing the literature, and for completeness, including reasoning for why they were rejected. This would add a considerable amount of work at this stage and also falls outside the scope of WALIS. As stated in the sentences added to Section 1, most publications reviewed, even if not providing a RSL indicator, were included if they contributed to the discussion within Section 4.

**Comment 3.** *Another surprising omission is any discussion of the relative sea levels that have been compiled. While I appreciate this is primarily a data paper, I was surprised to not see any discussion of the graphs in the lower parts of Figures 3 and 4. While I am biased in that I am a tectonic geomorphologist, and the patterns that are obtained are almost entirely likely the result of tectonics, I still find it odd not to discuss the results. The total range of RSLs are also mentioned in the abstract, but not elsewhere. Again, I'm only suggesting a few sentences should be added, probably to section 4.3.*

The role of coastal deformation in resolving a useful RSL record is discussed in Section 5.2, which has been significantly altered from the version Dr. Litchfield has read in response to Reviewer 1 comments. (See also response below to **Pdf Comments Section 5.2**). However, Dr. Litchfield is right in that we should mention the role of tectonics in this summary. The following was added:

The varying elevation of the RSL indicators (Figure 3E and 4I) illustrates the role of tectonics in shaping the New Zealand coastline. For example, the transition from the subsiding landscape of the Canterbury Plains to an uplifting one in the north is distinctly marked by the elevation of RSL indicators. The substantial imprint of tectonics makes difficult the development of a sea-level record that can be resolved to modern sea level (Section 5.2) and underlines the historical tendency to use these records for determining VLM rates but not a record of sea level.

**Comment 4.** *In several places there are references to the Otago coastline previously being considered to be tectonically stable. While this was certainly a key assumption for construction of the NZ Holocene sea level curve (Gibb, 1986) I think the deformation of the coast south of Dunedin has been long known. Personally (and I acknowledge I'm biased and sensitive to this since it was my PhD area) I've always considered the stable part of the South Island to be farther south, in southeast Southland (including Rakiura/Stewart Island). So I'd recommend changing the references to Otago being stable to be "parts of Otago/SE Southland", or if this is too much of a mouthful, just say "the SE South Island" rather than singling out Otago. You may even like to reiterate the concerns about the impact on the Holocene NZ sea level curve from the deformation of the LIG terrace at Blueskin Bay, as I don't think this point has really been made strongly enough previously.*

It is difficult to include the southeast as stable when there are no publications providing record of a sea-level indicator in support. We noted that Beavan and Litchfield (2012) referred to portions of this coast as stable citing Turnbull and Allibone (2003). This is a geologic map and only provides very generalized information regarding a terrace ‘inferred to date from OI stage 5 (70 – 130 ka)’ (p. 48). Furthermore, the terrace is described as increasing in height from 5-7 m above sea level near the Maitua River to 25-60 m above sea level west of the Waiau River – hardly indicating stability. However, in appreciation for Dr. Litchfield’s familiarity with the section of the coastline, we have added the following to the end of Section 4.2.1 West Coast and Southland:

Beavan and Litchfield (2012) report the coastline of eastern Southland, into the Otago Region, includes regions of stability, referencing Turnbull and Allibone (2003). However, this is a reference to a geological map without any precise locations, elevations, or geochronological constraint. No other publications detailing potential RSL indicators in the region were identified in our review. Nevertheless, this indicates eastern Southland is a potential source of valuable RSL indicators little affected by tectonic deformation and worthy of further investigation.

Additionally, reference to eastern Southland stability was added throughout the manuscript.

We also agree with Dr. Litchfield that the deformation of the LIG terrace at Blueskin Bay has serious implications for the Holocene NZ sea level curve but have opted to not include a comment within the manuscript. However, we added emphasis that the fault movement provides evidence of instability within Otago.

**Comment 5.** *I applaud the use and updating of the Pillans (1990) figure in Figure 1, but I do have an issue with the depiction of the modern beach and platform. There is a significant body of research on processes of formation of rock shore platforms in NZ (none of which I note is referenced) and my understanding of it and my own personal observations is that where there is a well developed shore platform, it generally forms between high tide and low tide. I appreciate that discussion of much of this is beyond the scope of this paper, but I would like to see this part of Figure 1 updated to reflect this and at least some reference to the shore platform literature. A good starting place would be review paper by Dickson and Stephenson (2014) – The rock coast of NZ, Chapter 13, in: Kennedy, D. M., Stephenson, W. J. & Naylor, L. A. (eds) 2014. Rock Coast Geomorphology: A Global Synthesis. Geological Society, London, Memoirs, 40, 225–234. <http://dx.doi.org/10.1144/M40.13>.*

It is important here to clarify the landform features being discussed: a rocky shore platform with no or minimal overlying sediments versus the sub-horizontal platform upon which marine terrace sediments have been deposited. These landforms typically differ in scale – the former are often only a few tens of meters wide (outer to inner margin), whereas marine terraces can be hundreds to thousands of meters in width. Furthermore, as Dr. Litchfield notes, a rocky shore platform forms at a different position relative to mean sea level than a marine terrace and therefore, also differs in indicative range. We would argue the more relevant issue to be recognized from Dr. Litchfield's comment is with regards to terminology and the importance of adequately describing landform features. As noted in the manuscript, Pillans (1990a; b) recognized significant confusion in nomenclature of marine terrace features inspiring him to establish terms and definitions that continue to be used, including 'wave-cut shore platform' used within our manuscript. However, with respect for the current discussion surrounding the formation of shore platforms, we have changed instances of 'wave-cut shore platform' to 'basal platform' when discussing the sub-horizontal feature beneath marine terrace sediments unless specifically referred to as wave-cut shore platform by original author. We have added text to Section 2 to clarify our distinction between a marine terrace (with a basal shore platform) and a rocky shore platform. We have also added the differing indicative meanings with the inclusion of Table 2 (See response to **Comment 1**).

Marine terraces have a similar morphology to rocky shore platforms, resulting in shared terminology. However, shore platforms are distinguished from marine terraces by their exposed bedrock surface and relative lack of overlying sediment reflecting active erosional and weathering processes (Griggs and Trenhaile, 1994). The relative roles of marine and subaerial processes in shaping rocky shore platforms remains equivocal (e.g. Stephenson, 2000; Stephenson and Kirk, 2000; Trenhaile, 2008), and shore platforms do not form at uniform elevations because of sea-level alone (e.g. Kennedy and Dickson, 2007; Kennedy et al., 2011; Stephenson and Naylor, 2011). A number of publications from the West Coast and Southland Regions (e.g. Wellman and Wilson, 1964; Bishop, 1985; Bull and Cooper, 1986; Section 4.2.1) allude to landforms which may possibly be features of rocky shore platforms; however, sufficient morphological description to identify a RSL indicator from a rocky shore platform was only provided by Kim and Sutherland (2004; Section 4.2.1). To avoid confusion within Section 4 between rocky shore platforms and the basal shore platforms underlying marine terraces, the latter is referred to as basal platform within Section 4 where it is apparent that the platform is overlain by marine sediments.

**Comment 6.** *There are quite a few references missing from the reference list, which I've listed below. Some may be typos that I wasn't confident enough to correct on the pdf, but in particular most of the references in Table 2 are missing. Bowen et al. (1988) Bowen et al. (1998) Brown (1988) Bull (1985) Chappell et al. (1996) Cowie (1961) Cowie (1981) Goodfriend et al. (1995) Hammon et al. (1983) Lambeck and Chappell (2001) Lowe (2019) Ludwig et al. (1996) McGlone et al. (2004) Muhs (2000) Palmer (1988) Pillans (1985) Pillans (1986) Pillans (1991) Pillans et al. (1994) Pillans et al. (1998) Siddall et al. (2007) Veeh and Chappell (1970) Vucetich and Pullar (1982) Ward (1967) Worth and Grant-Mackie (2003).*

This is a rather embarrassing lack of oversight and we are extremely grateful to Dr. Litchfield for having pointed out these omissions. We have corrected typos, added the missing references, and completed a more thorough check of the manuscript to make sure no other references were omitted from the reference list.

Typos: Bowen et al., 1988; Brown, 1988; McGlone et al., 2004; Palmer et al., 1988; Pillans, 1983

Added to references: Bowen et al., 1998; Bull, 1985; Chappell et al., 1996; Cowie, 1961; Harmon et al., 1983; Lambeck and Chappell, 2001; Lowe, 2019; Ludwig et al., 1996; Muhs, 2000; Pillans, 1991; Pillans et al., 1994; 1998; Siddall et al., 2007; Stirling et al., 1996; Veeh and Chappell, 1970; Vucetich and Pullar, 1969; Ward, 1967; Worthy and Grant-Mackie, 2003

**Comment 7.** *Please also note the supplement to this comment: <https://essd.copernicus.org/preprints/essd-2020-288/essd-2020-288-RC2-supplement.pdf>*

There are number of minor comments throughout the manuscript pdf (the supplement), such as suggestions for minor changes to wording and figures. These suggestions were followed throughout. However, there were some more substantive comments, which are copied here and for which a more detailed response is provided.

**Pdf Comment Section 1 Introduction:** *Can you expand this [WALIS framework] a bit more? Perhaps also include an example? As per main comments, I'd like to see this introduced a bit more so this is a stand-alone paper. What is the purpose and scope of WALIS?*

It is difficult to expand on what is already written. As stated, the WALIS database provides a framework for the cataloguing of published last interglacial RSL indicators: their descriptions, geochronological constraint, and associated metadata. To assist in clarifying the data entry character of the database the following sentences was added:

The intuitive interface of WALIS provides a standardized template for data entry, clarifying the collection and analytical methods used in identifying and describing previously published and new paleosea-level proxies and the source of any associated uncertainties for the scientific community. This includes fields for type and description of sea-level indicator, elevation measurement method and uncertainty, geographic positioning method and uncertainty, sea-level datum, and geochronological constraint, methods, age and uncertainty; e.g. amino acid racemization and luminescence.

As for providing an example – the link in the third sentence is to the database created from this work. The link in the fourth sentence is to the database field descriptors within the database. Other than a worked example, which would be excessively long, nothing further can be added.

**Pdf Comment Figure 1:** *I don't quite agree with the way this is drawn. Most modern shore platforms in NZ form between low and high tide, so mean SL and the breaking depth should be lower.*

Figure 1 was drawn showing only the upper and lower indicative range of marine terraces, which differs from rocky shore platforms. The response to **Comment 5** addresses the distinction between marine terrace and rocky shore platform and the response to **Comment 1** provides more detail regarding indicative range. We chose not to include the indicative range of a rocky shore platform to Figure 1 because 1) they are not a common RSL indicator identified within the database, 2) it would make the Figure pretty messy, and 3) the indicative range of a rocky shore platform is included in the new Table 2 (**Comment 1**).

**Pdf Comment Figure 2:** *You can't see the Regional boundaries onshore (grey on grey) – change the colour.*

While we appreciate that you cannot see the Regional boundaries onshore, this is not of importance in this figure as the sole purpose is to show the subdivision of the coastline by Region. Furthermore, visible boundaries onshore would be complicated by the division of the tectonic regimes and numerous faults resulting in a confusing and messy figure.

**Pdf Comment Figures 3 and 4:** *Why don't you show the uncertainties? By showing all the datapoints with the same size symbols is a bit misleading.*

Due to the scale of the y-axis in most instances the uncertainty of the RSL indicator is smaller than the symbol and not visible. Scaling the symbols to the y-axis would make the majority practically invisible. For marine and terrestrial limiting points, where uncertainty is visible, overlap with the indicator arrow adds confusion as to the actual uncertainty. The numerical elevation and uncertainty are available for every indicator in the text as well as in the database. The primary message of Figures 3 and 4 is the location of indicators around the North and South Islands and to illustrate the variable elevation of RSL indicators as a reflection of displacement.

**Pdf Comment Section 4.2 South Island.** *I'm surprised not to see any mention of the marine terraces in the NW Nelson area (e.g., Farewell-Collingwood and Kahurangi areas) and the subsidence of the Marlborough Sounds. I appreciate the data is quite poor, but it might be worth mentioning this.*

We did identify some potential references for RSL indicators in the Nelson and Tasman regions – mostly through use of the references list within Beavan and Litchfield, 2012. Briefly, those references are:

- Johnston (1979) Geology of the Nelson urban area.
- Bishop (1968) Geological map of New Zealand 1:63,360 Sheet S2 Kahurangi
- Bishop (1971) Geological map of New Zealand 1:63,360 Sheet S1, S3 and pt S4 Farewell-Collingwood
- Rattenbury et al. (1998) Geology of the Nelson area
- Williams (1982) Speleothem dates, Quaternary terraces and uplift rates in New Zealand
- Berryman and Hull (2003) “Tectonic controls on Late Quaternary shorelines: a review and prospects for future research”

Bishop (1971) we were unable to get access to. Bishop (1968) only alludes to the presence of a marine deposit. The other map sheets (Johnston, 1979; Rattenbury et al., 1998) have the before state issues of no precise locations, elevations, or description adequate for the identification of a RSL indicator. However, an additional statement was added to the top of Section 4.2 to acknowledge the presence of marine terraces in the region:

No RSL indicators have been correlated to MIS 5 in the Nelson or Tasman Region; [although geological mapping in the region indicates the presence of marine terraces in the area of Nelson City \(Johnston, 1979; Rattenbury et al., 1998\).](#)

Williams (1982) is also briefly discussed at the top of Section 4.2. The publication was rejected for a couple of reasons. The only location information is cave names, many of which appear to be no longer in use as they could not be found on any current maps from which we could derive lat/long coordinates. Furthermore, the speleothems provide minimum ages for cave formation and there is no description or substantial discussion of LIG sea-level indicators.

Berryman and Hull (2003) is a book that we did not review.

**Pdf Comment Section 4.3 Summary of New Zealand RSL indicators.** *I think you could and should add some brief discussion in here on the RSL indicator elevation patterns (Figs. 3e and 4i) and relationship to tectonics.*

See response to **Comment 3**.

**Pdf Comments Section 5.2 Coastal deformation and GIA.** *This is a really useful section, but it would be even more useful if you could make some stronger recommendations about what should, and could, be done.*

We are not entirely sure what is being asked for here, whether it be recommendation for deriving a RSL curve or how to account for coastal deformation and GIA. (Before responding further, we should note that this section has been significantly altered in response to review comments by Prof. Tim Naish and that revision may better meet Dr. Litchfield's request.) If the request is for better recommendations to derive a RSL curve, as noted in the text,

[Excessive and prevalent coastal deformation will preclude the development a sea-level reconstruction that can be registered to present day, regardless of the quality of sea-level indicators.](#)

In other words, an RSL curve registered to present day sea level is not possible where there has been excessive deformation (see also response to **Comment 3**). This is why the Northland and SE South Island are important regions for future research to identify additional MIS 5e sea-level indicators, which will also help to constrain GIA models. However, our new revised text also notes that,

[Although any sea-level reconstruction derived from these indicators may not be useful for a relative sea-level curve with relation to present sea level, more precise descriptions and age constraint can improve estimates of VLM rates, especially where there is uncertainty in correlation to the appropriate MIS 5 highstand. Furthermore, where high rates of uplift have produced marine terrace sequences recording multiple substages of MIS 5, there is opportunity to better constrain not only regional sea-level fluctuations within MIS 5 but paleoenvironmental change as well.](#)

*Please reword as I don't think this is true for much of NZ and isn't quite what Beavan and Litchfield (2012) said. What we actually said was that in areas of large earthquakes then the long-term VLM can be obtained from the geologic data. We didn't actually talk about long-term VLM in areas of earthquakes because you have to untangle the interseismic and coseismic deformation, which in some places (e.g., the Hikurangi Margin) can be in the opposite sense. I don't think it's that important for your paper, but please remove the inference that the short-term interseismic VLM reflects long-term VLM.*

The sentence Dr. Litchfield is requesting to be reworded is,

“Although displacement by an earthquake can have dramatic effect, interseismic deformation (deformation between earthquake events) is more likely to influence long-term trends in VLM (Beavan and Litchfield, 2012).”

We certainly thank Dr. Litchfield for her comment and explanation as none of us are tectonic geomorphologists and we obviously misinterpreted the original publication. We have deleted the sentence.

**Pdf Comment Section 5.3.4 Luminescence.** *Can you be more specific here about what is missing? Is it missing in all papers? (e.g., do the Litchfield and Lian, 2004 and Oakley et al., 2017 papers have the required info? Can [we] be more specific? Is this the full list, or just some of the required data? Is there a paper that you could reference as an example of what is needed? Does including the OSL dating report as an electronic supplement cover it?*

We thank Dr. Litchfield for this comment and welcome the opportunity to further clarify what information is required. In any scientific experiment, the methods section ought to set out what has been done to your samples so that the reader, in theory, should be able to replicate the results. For the literature that was reviewed as part of this paper, these methods sections were, for the most part, lacking in that detail – it should be noted that the two papers in this comment cited (Litchfield and Lian, 2004 and Oakley et al., 2017) were among the most complete with the required information. We have provided a detailed response that is divisible into three sections: 1) equivalent dose evaluation, procedures, and equipment; 2) dose rate determination; and, 3) presentation of the results. Our response is quite long and will be added to the publication as Supplementary Material, “Recommendations for Reporting Luminescence Method”. It is referred to in the manuscript with the addition of the following sentence:

[The WALIS database interface allows for the reporting and archiving of all critical luminescence data and a full recommendation list is provided in the Supplementary Materials.](#)

Our detailed response, to be included in Supplementary Materials, is as follows:

### **Recommendations for Reporting Luminescence Method**

#### **1. Equivalent dose**

Basic information required includes: mineral type; pre-treatment techniques including whether or not the samples were etched in hydrofluoric acid (HF) and, if so, at what concentration and for how long; machine and photomultiplier tube type; detection filters used; single grain or single aliquots used; if aliquots were used, the diameter size; De determination method used (e.g., single aliquot regenerative dose, single aliquot additive dose, multiple aliquot additive dose, etc.); and an outline of the rejection criteria used to screen the data.

It is well documented that luminescence dating of New Zealand sediments and determination of the equivalent dose (De) is not straight forward for either quartz or feldspar. Focusing on feldspar dating, the De measurement procedure used is particularly important as it comes in several variants (e.g., IRSL50, pIRIR270, pIRIR290, etc.), each with their own strengths and weaknesses. This procedure needs to be spelt out in full either in the main text or in the supplementary information and include the magnitude and duration of preheating, light stimulation duration, and sample temperature. Hand in hand with feldspar dating is an assessment of the rate of luminescence signal lost, known as anomalous fading. The method of assessment should be noted and the results presented fully (%/decade  $\pm$  standard error), not just a statement saying that it was ‘not significant’ or similar. There should also be an assessment of the magnitude of the residual dose remaining after a period of either solar or artificial bleaching. Again, the methods should be written in full with the magnitude presented  $\pm$  standard error. A dose recovery test should also be performed using a subsample of grains that have been bleached and given a laboratory dose to determine the most appropriate preheating parameters used during measurement. For quartz, reporting should include all of the above, except for the fading and residual dose as these are not applicable. This information can be reported in the main text; however, it is more common to include in a supplementary information section.

#### **2. Dose rate determination**



Basic required information includes: method/technique used to assess external alpha, beta and gamma dose rates (where applicable); measurement results and/or assumption made about internal uranium and thorium content for quartz, or both of these and internal potassium for feldspars; method/calculations used for assessing the cosmic ray dose rate; water content evaluation and an estimate of the long-term water content used in age calculations; dose rate conversion factors used to convert concentrations to Gy/ka; and attenuation factors associated with external beta dose rate and any consideration of the impact that HF-etching might have on this value.

Ideally, an assessment of whether or not there is any disequilibrium in the uranium and thorium decay chains should also be conducted. Although this is not essential, some consideration of disequilibrium should be mentioned.

### **3. Presentation of results**

A summary of the De, dose rate, and age calculation results for each dated sample should be presented in a table in the main text. This table should include: Sample name; external dose rate values and their associated uncertainties (alpha (where applicable), beta, gamma, and cosmic); total dose rate; sample De; an estimate of overdispersion (the amount of spread within the data after all known and assumed sources of uncertainty have been considered); the age model or method used in combining individual De estimates in each sample; and the age estimate. Other optional columns would include: sample depth; 'as measured' water content; and the number of grains/aliquots used in final De determination. Ideally, a table should also be included in the supplementary information section showing the total number of grains/aliquots measured for each sample and where they failed to pass the established rejection criteria.

Most importantly, the spread within the De values for each sample needs to be displayed graphically. Although our preference is for the use of radial plots; abianco plots, and probability density function could also be used. It is on the basis of the distribution of De values in each sample that the sample's De is determined and used in the age calculation. In many cases, the patterns observed in De distributions directly relate to the syn- and post-depositional histories of the samples and, by extension, the appropriateness of the age models used to combine them. We would recommend that an example of the observed De distributions be included in the main text, with all distributions reproduced in the supplementary information.

#### **o Inclusion of dating reports**

Although it is not recommended that you simply cut and paste a dating report into the supplementary information section, they are certainly a good place to start. Of the commercial firms that authors have used, most of these laboratory reports quickly off reference critical pieces of methodological information to sources that are either outdated or buried in hard-to-access journals or grey literature. However, any reputable dating laboratory should be able to provide you with the basic information outlined in our above response.
